# Supplementary material
Source: publisher figshare collection journal article supplement (https://tandf.figshare.com/ndownloader/files/14065823)
Supplement: Supplementary file 1 [file 14065823]

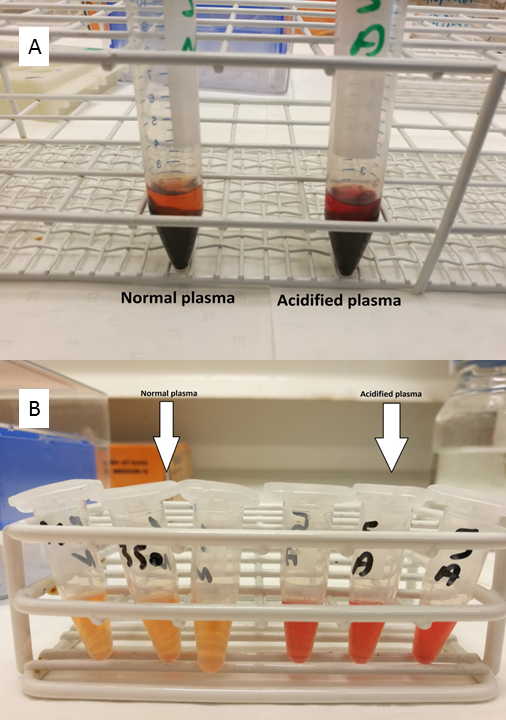


**Supplementary figure**

Whole blood from a healthy individual was obtained and mixed with EDTA as anti-coagulant. Blood was acidified using citric acid (1M, 50µL/1mL blood). Treosulfan was added to the whole blood samples at final concentrations of 0.5, 1 and 5 mM and plasma was separated by centrifugation at 4000 *g* for 10 min. The same experiment was repeated in normal blood (non-acidified) and both experiments were run in triplicates.

Acidified plasma was highly hemolyzed compared to the other samples. Such hemolysis can interfere with several detecting methods and affects the results. Additionally, these hemolyzed samples may not be valid for most of the other biochemical investigations. No significant difference was found in treosulfan degradation in normal blood samples compared to acidified samples (93%).

A; after centrifugation, B; after plasma separation.
